# Supplementary material for: Chemogenetics defines a short-chain fatty acid receptor gut–brain axis
Source: eLife. 2022 Mar 1;11:e73777. doi: 10.7554/eLife.73777 (PMC8887895; doi:10.7554/eLife.73777)
Supplement: Figure 1—figure supplement 1—source data 1. [file elife-73777-fig1-figsupp1-data1.xlsx]

## Sheet: supplementary figure 1
Plate no.	Z'	B
1	0.6
2	0.6
3	0.72
4	0.68
5	0.62
6	0.67
7	0.68
8	0.61
9	0.65
10	0.64
11	0.63
12	0.72
13	0.63
14	0.81
15	0.78
16	0.66
1	35.17	7.93	258.68	22.16	C
2	29.9	6.2	264.45	24.73
3	32.87	9.98	259.3	11.24
4	42.52	8.11	255.05	14.82
5	42.1	16.17	244.69	9.65
6	40.04	7.41	230.24	13.32
7	41.19	5.62	271.46	19
8	39.18	8.34	277.54	22.47
9	33.88	7.83	283.38	21.12
10	28.81	12.72	280.98	17.8
11	35.87	10.36	279.36	19.64
12	38	5.66	314.33	20.26
13	33.26	8.08	292.02	23.49
14	39.49	5.65	310.43	11.59
15	37.7	7.34	295.67	11.89
16	29.75	7.91	269.38	19.41
