# Supplementary material for: Chemogenetics defines a short-chain fatty acid receptor gut–brain axis
Source: eLife. 2022 Mar 1;11:e73777. doi: 10.7554/eLife.73777 (PMC8887895; doi:10.7554/eLife.73777)
Supplement: Figure 1—figure supplement 2—source data 1. [file elife-73777-fig1-figsupp2-data1.xlsx]

## Sheet: 98996_1_additional_figure_data_
	C3	C3	C3	C3	C3	C3	C3	C3	C3	C3	C3		36	36	36	36	36	36	36	36	36	A
-2	118.032	82.1308	93.1452	107.041	84.7398	111.36	106.38	97.1593	99.2568	119.606	84.0684
-2.5					68.175	92.4445	76.9976	120.104	87.972	101.773	105.415
-3	91.5854	69.1647	84.2518	112.32	75.1787	59.6288		67.3114	69.419	69.8772	66.1464				-12.192	-8.83179	-13.7549	33.3045	43.3396	36.951	-1.42024
-3.5	50.0086	44.0112	51.196	31.1026	26.0172	43.6283	47.333	54.5792	25.9084	6.13828	16.6293				-2.15245	-20.8508	-7.59548	12.279	41.7533	53.897	1.53506
-4	19.0408	47.1639	31.2826	7.3735	72.0204	15.2645	38.3		4.65438	-24.3129	15.6167		-12.1492	8.13517	-15.7846	-35.9685	-25.7213	14.9094	0.981621	10.3646	-39.9722
-4.5	29.4818	15.4064	-6.34806	-3.40381									-2.26632	8.79609	-42.3952	-24.0483	-12.1538	32.9966	9.69472	49.9322	18.4187
-5	5.47737	-9.40193	0.262451	-25.2134	-22.1991	-8.37249	-0.953571	-14.2852	-19.5833	-9.3812	-33.4878		20.2296	-4.07374	-38.8969	-29.6518	-1.25247		-24.3327	-6.79958	10.7701
-5.5													12.1164	-9.87302
-6	27.3157	7.14438	1.01774	5.5735	-4.80823	23.8148	-19.7796	14.5565	-19.1287	14.5609	-15.8684		10.1021	10.3149	-52.62	2.46006	-27.2554	24.6711	-13.9451	10.0159	18.8664
-6.5													22.1981	2.37253
-7	1.66578	-1.85041	0.630662										16.7614	-6.12023	-32.9977	-3.96409	-29.1365	23.1426	-1.04314	21.9188	16.7181
	human	human	human	mouse	mouse	mouse	B
vehicle	99.9984	99.8863	100.074	99.7237	100.165	100.043
1mM C3	37.6095	39.1182	24.3992	73.334	50.7662	23.8034
1mM sorbic acid	73.618	106.863	63.6309	103.756	90.9022	78.6271
100mM MOMBA	78.7719	85.2262	52.1042	94.6564	77.4832	75.0791
	human	human	human	mouse	mouse	mouse	C
vehicle	99.9825	99.1888	99.9168	100.313	100.184	100.059
1mM C3	19.2959	13.3242	16.6858	13.8299	8.85186	29.5878
1mM sorbic acid	78.0543	126.045	180.682	128.378	127.64	157.905
100mM MOMBA	87.4221	113.527	94.8837	104.857	111.33	145.346
