# Supplementary material for: Chemogenetics defines a short-chain fatty acid receptor gut–brain axis
Source: eLife. 2022 Mar 1;11:e73777. doi: 10.7554/eLife.73777 (PMC8887895; doi:10.7554/eLife.73777)
Supplement: Figure 1—figure supplement 3—source data 1. [file elife-73777-fig1-figsupp3-data1.xlsx]

## Sheet: 98996_1_additional_figure_data_
	C3	C3	C3	Sorbate	Sorbate	Sorbate	C36	C36	C36	A
-2	22.7176	12.6503	24.4163
-2.5	34.9039	39.6178	18.7773
-3	30.2181	34.9275	5.05191	73.8699	67.1148	74.0524
-3.5	22.3611	22.9862	3.52292	65.8341	62.8327	68.8359	100	96.4632	100
-4	17.3198	11.875	1.22944	94.8556	84.0739	73.4562	70.0512	96.4687	82.9036
-4.5	13.3707	10.8082	1.94594	35.5243	37.5034	64.5797	64.4619	95.8157	75.0972
-5	18.1835	4.16008	2.7303	26.3253	27.596	23.9545	60.143	55.6	55.7361
-5.5	15.9298	17.4868	3.64376	13.8443	16.7196	0	18.4389	55.8008	59.8881
-6				6.53606	8.53227	5.99812	16.0843	15.3645	16.0994
-6.5				0	4.22903	1.80149	8.87968	9.0706	12.1801
							4.46768	0	3.03283
	sorbate	sorbate	sorbate	sorbate	sorbate	sorbate	C3	C3	C3	C3	C3	C3	momba	momba	momba	momba	B
-2							79.6836	44.2149	80.8332	58.0127	65.0432	67.3259
-2.5	86.0387	93.9973					18.541	17.9496	24.1937	25.9166	24.1996	19.902
-3	96.8175	90.3458	103.216	115.396	87.6942	99.7717	11.3545	9.45288	5.14703	9.41905	18.0716	8.29102	99.824	127.203	152.744	148.138
-3.5	100.171	111.565	101.311	67.9759	99.2124	91.4338	7.75544	7.55665	9.5041	4.27221	2.03496	4.59848	118.186	112.703	140.649	124.183
-4	104.97	105.388	95.8947	77.9099	119.43	90.9521	5.51403	6.7827	10.012	6.27214	2.76454	2.91375	124.083	124.083	123.367	152.744
-4.5	92.6405	81.8012	99.0926	97.6516	79.3834	90.4739	5.41056	6.70409					92.1864	118.659	186.854	121.766
-5	76.6773	72.733	108.011	93.1779	89.0665	95.971	6.82201	6.60062	3.81779	6.49085	1.20082	3.95114	92.5145	114.939	148.138	122.562
-5.5
-6	14.1458	11.6089	14.2087	22.9107	16.3657	14.5236	5.54882	6.13481	6.78488	7.23444	4.28949	2.83151	36.881	29.3309	20.3027	19.2899
-6.5
-7	6.69098	6.7958	4.5055	5.31713	2.05023	4.00753			3.27833	3.84939	3.73144	2.55307	5.11058	5.73753	5.01907	4.59848
-8			4.63672	0.702476	2.79744	3.18514			5.4921	3.43628	4.48217	2.05023	3.75461	3.915	3.09937	3.04885
-9			2.78503	2.75344	3.34139	2.76454							5.00852	4.2066	4.42342	3.62335
	C3	C3	C3	Sorbate	Sorbate	Sorbate	C36	C36	C36	C
-2	3275.71	2700.71	2670
-2.5	2605	2532.86	1755
-3	1545.71	1585.71	1505.71	4286.43	5586.43	5326.43
-3.5	1297.14	1357.86	1312.86	5353.57	4868.57	6337.86
-4	1252.86	1196.43	1248.57	5666.43	4904.29	4980	5740.71	7007.86	5747.14
-4.5	1185	1149.29	1157.86	4924.29	4840.71	4659.29	6050	6205	6107.86
-5	1001.43	1022.14	979.286	3980.71	3852.14	3072.14	5192.14	5292.14	6115
-5.5	972.857	955	975	2697.14	3401.43	2625	4707.14	4181.43	4877.86
-6	1176.43	1105	1097.14	2017.14	1986.43	1955.71	3491.43	3527.86	3383.57
-6.5	1196.43	895.714	1177.14	1663.57	1680.71	1648.57	2314.29	2237.86	2250
-7	872.857	1124.29	905	1297.14	1357.86	1312.86	1545.71	1585.71	1505.71
-7.5	883.571	895	945.714	1138.57	1153.57	1097.86	1185	1149.29	1157.86
-8				987.857	1031.43	974.286	1001.43	1022.14	979.286
-8.5				978.571	983.571	967.857	972.857	955	975
	CATPB	CATPB	CATPB	GLPG0974	GLPG0974	GLPG0974	D
-5	52.5	72	43.5	15	16.5	31.5
-5.5	54	52.5	27	57	24	48
-6	87	73.5	73.5	97.5	102	103.5
-6.5	174	285	270	252	250.5	184.5
-7	1131	1012.5	1122	859.5	589.5	451.5
-7.5	2488.5	2413.5	2431.5	2664	2643	2512.5
-8	2103	3646.5	3556.5	4236	2671.5	4107
-8.5	3843	3505.5	4297.5	4243.5	4279.5	3462
-9	4570.5	3820.5	3804	4224	4351.5	4557
-9.5	5512.5	4881	5472	5391	5422.5	5305.5
-10	4833	5361	4900.5	5074.5	5166	5046
	C3	C3	C3	C3	sorbic acid	sorbic acid	sorbic acid	MOMBA	MOMBA	MOMBA	MOMBA	AZ	AZ	AZ	AZ	E
-12												0	0	0	2.42981
-11												0.99094	27.7478	24.844	2.96976
-10												8.49377	49.2363	45.4941	13.6069
-9												20.2718	54.2977	54.0996	17.9266
-8					0	0	0	0	0	0	0	78.171	83.1686	87.4764	39.3089
-7.5													111.545	101.248	67.7106
-7	0	0	0	0	-0.690608	3.02576	0	1.88938	4.02815	3.64243	-0.827515	122.112	103.564	107.735	109.287
-6.5												134.117	102.725	109.607
-6	-0.536723	4.69484	12.0715	0.790514	6.51934	7.66926	5.60149	7.5575	10.4972	14.4391	5.06853	129.36	102.576	104.31
-5.5
-5	0.564972	5.93114	1.52694	1.10672	29.3094	23.7567	22.5927	44.1402	45.9719	52.4307	40.781
-4.5					64.9171	54.2241		75.4107	75.0225	73.1389	72.5627
-4	2.20339	7.68388	2.96745	5.45455	84.4751	77.3068	86.9565	104.587	92.1533	97.8668	123.3
-3.5	2.85311	5.94679	0.777874	-3.26746	107.072	89.7843	115.764	112.185	103.07	102.38	137.548
-3	0.508475	11.8466	2.276	4.03162	118.232	95.012	131.128	130.75	106.274	105.906	145.901
-2.5	5.36723	16.5884	2.67934	7.82609
-2	14.322	32.4883	2.21838	18.2082
	C3	C3	C3	sorbic acid	sorbic acid	sorbic acid	MOMBA	MOMBA	MOMBA	MOMBA	AZ	AZ	AZ	AZ	F
-12											0	0	0	5.16854
-11											2.68931	21.9848	22.4452	-2.47191
-10											7.99717	46.0341	40.7182	3.14607
-9											13.8712	52.3904	45.8674	11.4607
-8				0	0	0	0	0	0	0	55.6263	76.2586	74.967	24.9438
-7.5												93.3358	96.8049	50.5618
-7				-0.614606	-0.868193	0	3.42891	-0.416516	0.0792184	-8.96352	95.5768	106.936	114.022	87.4157
-6.5											116.985	113.781	113.89
-6	5.24642	1.346	-1.74777	-0.506146	1.15759	-0.470763	3.83428	-1.14089	3.53842	-7.24813	119.568	111.083	124.954
-5.5
-5	7.27345	1.53075	2.02439	-2.27766	-2.10471	4.03865	3.51791	-1.84716	1.55796	-3.64822
-4.5				3.21764	1.99947		3.95195	-0.0362188	2.19171	-0.990577
-4	7.94913	3.43098	-2.52735	1.26537	3.49908	0.619425	3.66323	0.543281	5.41326	-2.39188
-3.5	6.67727	1.39879	-2.12498	-2.31381	3.89371	-1.75917	3.45211	-0.977907	6.97122	-1.54627
-3	6.51828	3.06149	-3.58355	-2.67534	-1.15759	-7.30922	3.54328	1.32198	10.0607	-2.53685
-2.5	9.062	-0.0791766	-0.792154
-2	11.9237	-0.0791766	-5.09242
