# Supplementary material for: Chemogenetics defines a short-chain fatty acid receptor gut–brain axis
Source: eLife. 2022 Mar 1;11:e73777. doi: 10.7554/eLife.73777 (PMC8887895; doi:10.7554/eLife.73777)
Supplement: Figure 1—source data 1. [file elife-73777-fig1-data1.xlsx]

## Sheet: Figure 1
-1.5						103.692	102.901	93.6177	103.729	88.5714	105.616	A
-2	113.364	107.471	79.935	103.748	95.9993	97.6637	99.7275	105.286	115.176	100.059	122.108
-2.5	77.2571	93.3621	94.8501	89.7683	84.9461	89.1513	88.9208	85.1716	99.487	79.4595	102.103
-3	86.0674	86.0794	91.9704	88.4413	73.9332	89.8157	87.2369	74.8905	80.4664	86.0236	87.1412
-3.5	66.8722	73.8194	65.9609	69.0391	63.8922	74.1128	60.8132	63.2679	64.8082	76.9084	65.8954
-4	46.4904	42.0959	51.4436	42.3656	44.914	45.7793	47.6599	49.5091	46.5551	46.9487	43.723
-4.5	9.37948	21.8705	17.5428	17.3362	16.2824
-5	-4.82277	-1.35514	3.46264	5.39434	10.3038	3.98183	11.3413	8.94109	4.10851	9.35816	6.65794
-6	4.94071	7.33974	-5.04272	-6.67481	0.113908	2.3761	-5.11526	3.39032	-4.85504	1.56243	3.20308
sorbic acid	352.618	348.11	327.452		775	80.8902	63.8317	75.7985	B
2	72.9045	69.4591	64.5044		797	68.4201	69.0823	69.8108
241	78.8901	79.2274	61.9499		807	73.2158	71.0518	71.3968
288	56.4692	71.1468	68.0036		918	72.5077	73.0862	49.7471
319	71.8426	52.0195	76.4606		928	62.3399	60.0731	74.3827
332	71.3809	68.7906	85.4065		968	60.7117	63.4548	48.5605
358	71.3245	73.0675	74.8929		976	66.4381	52.9938	80.8538
423	71.8625	85.5597	72.1346		999	28.0623	49.7363	55.6223
439	43.5397	53.5189	38.6737		1007	49.3241	63.8191	76.9185
463	72.9764	87.0359	61.3554		1023	49.672	76.1097	66.1742
466	71.9788	69.2302	83.4393		1046	69.5306	72.9703	67.8476
521	50.212	60.9065	66.0209		1057	54.8207	59.8826	73.6469
526	126.892	110.652	111.064		1061	84.2491	65.5853	67.1527
565	254.132	249.55	272.853		1067	92.5927	91.2021	83.727
612	62.4161	54.5887	62.131		1099	88.6185	64.5736	76.3833
631	70.8737	79.901	78.677		1174	56.5848	75.2877	68.5133
672	66.3496	62.2849	78.7952		1184	210.198	208.461	193.158
					vehicle	56.6409	52.2422	50.9933
	sorbate	sorbate	sorbate	sorbate	sorbate	sorbate	sorbate	sorbate	MOMBA	MOMBA	MOMBA	MOMBA	132	132	132	132					C
-1.5																	235	235	235	235
-2	100.1		100.131		101.695	98.2545	103.537	96.1883
-2.5
-3	85.3623	87.8737	75.4051	88.5197	85.3492	88.4195	74.9016	86.3206
-3.5	67.1343	62.7665	59.1368	64.1863	65.2212	55.4681	75.7498	67.9231
-4	51.2686	46.2139	46.6258	46.6337	41.9113	49.761	39.8795	37.9718
-4.5	21.3139	20.878	18.917	18.9904	22.512	10.7202	11.4796	17.6611
-5	10.0581	6.75499	2.21603	-0.468601	9.00253	5.48556	3.03239	-5.09617
-6	7.01629	4.54302	0.10156	0.866756	-4.57354	-5.69562	-15.0877	-2.63877
-7	-0.0301948		0.098201		-2.57862	-3.23183	-2.49438	2.887
-8
-3.5											53.6341	60.8984			37.9644	33.2432
-4									44.0967	52.6645	40.2282	53.4793	23.0258	15.688	24.1005	18.5419			67.2996	73.0426
-4.5									27.0471	27.742	25.3097	25.1952	8.09289	5.85327	4.82067	3.71613	56.8234	44.7594	62.5051	61.4727
-5									8.36122	9.32486	3.89965	3.18455	2.12585	8.00435	-0.619858	-1.43011	26.0946	29.3349	30.3999	25.8939
-5.5									2.86634	0.355695	-7.88877	4.62927	3.51587	-4.06938	-10.7913	-4.8885	3.36039	21.1044	14.6484	9.27505
-6									-0.944465	6.16339	-8.48487	-0.857281	2.84665	-1.28774	5.20322	-1.92859	-6.1228	-5.43189	-4.30338	3.01181
-6.5									-1.22526	-4.52881	-4.20999	-5.55619	-8.04842	-3.16608	-2.1118	-4.74857	-3.9455	-2.42889	-2.39309	-0.561441
-7									-3.72017	5.89577	-9.02705	-5.19001	2.35758	-0.0490982	-0.132713	-17.8144	-14.1457	-6.18869	-7.08343	-0.991692
-8									-6.70472	3.37212			0.00278173	6.10092			-8.08131	-8.21826	-9.92598	-2.88914
																	-9.13626	-9.26938
	NET BRET (MBRET)																									D
1	33.2276	26	17.7665	51	12.672	76	30.5993	101	32.8346	126	40.4534	151	39.7841	176	38.94	201	22.6508	226	24.2642	251	110.124	276	36.0433	301	12.3082
2	30.1595	27	28.5358	52	33.1313	77	32.9316	102	34.2682	127	36.7071	152	22.8613	177	35.2692	202	376.777	227	17.5932	252	29.7179	277	16.7482	302	41.1763
3	40.9954	28	42.5049	53	47.3135	78	20.3797	103	34.3566	128	49.9223	153	31.4705	178	36.4474	203	29.7286	228	44.1067	253	35.3687	278	23.3247	303	44.6705
4	28.1712	29	51.8975	54	54.0235	79	33.3692	104	73.2119	129	12.5766	154	14.914	179	54.8697	204	41.0515	229	26.6728	254	44.8244	279	96.5974	304	52.0083
5	41.5834	30	41.1434	55	38.0573	80	69.5727	105	20.8478	130	26.4496	155	10.3497	180	50.0131	205	56.5175	230	14.4178	255	21.561	280	26.2404	305	15.0841
6	44.8584	31	33.6937	56	58.044	81	40.2031	106	22.2242	131	59.8642	156	30.3153	181	31.3136	206	41.8323	231	32.972	256	45.345	281	26.759	306	7.2101
7	53.5166	32	37.8792	57	24.2325	82	31.3994	107	20.8578	132	30.9667	157	57.6962	182	35.3435	207	30.7426	232	52.3192	257	11.6651	282	39.8464	307	3.59179
8	39.2533	33	11.9322	58	40.2743	83	42.1777	108	21.3248	133	30.2194	158	47.8991	183	28.8348	208	55.3043	233	26.141	258	17.5558	283	29.141	308	15.206
9	37.3251	34	5.00865	59	59.7797	84	34.7376	109	32.5695	134	50.162	159	20.1083	184	48.4634	209	9.67665	234	17.8147	259	20.4738	284	34.0267	309	8.30271
10	44.5923	35	38.8514	60	43.8802	85	55.5687	110	40.6485	135	138.717	160	37.9989	185	37.141	210	31.2993	235	31.1122	260	67.5812	285	21.5613	310	17.432
11	62.4322	36	32.5282	61	33.3042	86	26.2456	111	126.774	136	73.3546	161	57.6825	186	59.7705	211	34.9126	236	27.1477	261	26.3765	286	17.3937	311	98.3173
12	47.9781	37	12.3805	62	44.8471	87	52.3743	112	80.4368	137	137.776	162	45.9354	187	34.1568	212	28.5153	237	28.4336	262	23.3157	287	30.7391	312	31.753
13	43.7813	38	28.3502	63	31.4428	88	78.9684	113	25.0913	138	12.4691	163	40.7033	188	38.7471	213	98.0224	238	333.95	263	29.2991	288	36.6149
14	59.3619	39	267.692	64	52.7146	89	43.9373	114	23.589	139	44.1224	164	40.268	189	35.2379	214	34.8968	239	32.971	264	53.501	289	25.1355
15	44.1864	40	33.8085	65	10.7316	90	21.3539	115	21.084	140	45.6073	165	40.5864	190	50.6958	215	26.8772	240	17.0625	265	21.0898	290	17.038
16	28.7103	41	38.2728	66	32.7021	91	35.017	116	21.7824	141	40.4484	166	44.2224	191	33.7964	216	31.6416	241	21.4856	266	179.069	291	27.4941
17	44.693	42	230.119	67	28.7352	92	105.509	117	24.1444	142	30.6543	167	162.466	192	24.5258	217	15.8546	242	44.9649	267	35.484	292	28.6559
18	33.7252	43	46.0283	68	7.74568	93	56.9361	118	13.923	143	18.7861	168	62.485	193	2.11246	218	76.0159	243	37.3946	268	18.0828	293	110.346
19	28.5467	44	21.2498	69	21.4249	94	34.0496	119	31.8338	144	42.9785	169	42.9899	194	50.3579	219	36.2324	244	33.5169	269	28.4966	294	8.55903
20	54.1162	45	64.8753	70	28.6927	95	38.9127	120	72.0999	145	36.3304	170	43.929	195	36.5015	220	43.3002	245	49.2589	270	42.0172	295	37.385
21	30.1641	46	29.1522	71	35.8141	96	26.3909	121	46.1975	146	89.8915	171	47.5663	196	17.2539	221	35.6591	246	36.3767	271	54.2122	296	33.9753
22	25.2053	47	44.7044	72	111.078	97	39.5495	122	67.2375	147	36.2243	172	47.3633	197	16.3689	222	48.8848	247	43.0644	272	42.1433	297	23.3827
23	17.4755	48	57.0598	73	14.1076	98	38.755	123	43.8887	148	25.4178	173	252.905	198	23.5893	223	39.7454	248	40.1084	273	37.6256	298	46.9404
24	33.897	49	31.135	74	20.9403	99	35.539	124	49.4832	149	41.5311	174	42.4393	199	34.1826	224	43.9149	249	35.4839	274	7.60389	299	1.73337
25	42.6316	50	23.2449	75	8.03626	100	28.1886	125	42.2458	150	41.6787	175	75.7477	200	13.112	225	33.8761	250	24.2406	275	18.6268	300	30.4131
