# Supplementary material for: Chemogenetics defines a short-chain fatty acid receptor gut–brain axis
Source: eLife. 2022 Mar 1;11:e73777. doi: 10.7554/eLife.73777 (PMC8887895; doi:10.7554/eLife.73777)
Supplement: Figure 2—figure supplement 1—source data 1. [file elife-73777-fig2-figsupp1-data1.xlsx]

## Sheet: 98996_1_additional_figure_data_
Vehicle	IBMX	DMSO	sorbic acid (1mM)	C3 (10mM)	MOMBA (0.1mM)	MOMBA (0.01mM)	MOMBA (0.001mM)		A
6.94837	100	7.49388	45.4906	15.9396	45.4981	28.9485	11.3934
4.94388	100	8.0951	43.4398	20.3299	47.4906	30.2941	12.9518
5.29388	100	5.09095	38.3095	8.40938	37.4904	15.0984	19.4981
7.30959	100	6.04938	39.4907	11.9348	32.8476	20.389	20.9048
5.98458	100	5.49308	50.2094	14.9406	52.8924	17.0496	15.3895
Time (min)	MOMBA	MOMBA	MOMBA	MOMBA	MOMBA	MOMBA	MOMBA	MOMBA	MOMBA + CATPB	MOMBA + CATPB	MOMBA + CATPB	MOMBA + CATPB		B
5	22.286	21.5715	9.76528	11.7268	17.143	12.7858	18.5657	15.7289	9.07252	12.4335	10.4314	18.2487
10	19.9507	22.93	8.7458	7.87565	20.347	11.465	15.7458	15.8757	3.45073	9.5595	16.4914	4.0264
15	17.295	24.5528	11.0376	10.0384	18.54	15.4093	14.8767	16.8367	12.0949	11.6231	0.46978	10.481
20	11.9497	23.8753	12.9336	14.8964	21.9346	31.0418	29.1168	34.0548	0.482317	16.7339	8.61916	4.98587
25	27.8712	23.7753	12.9464	14.6702	21.151	31.23	29.1383	34.9362	17.0438	6.09739	10.0319	8.06195
30	29.08	44.708	7.78867	17.9675	34.54	22.354	37.9887	42.975	12.5479	10.1041	8.49993	10.4995
35	46.68	30.91	9.8776	11.5746	43.34	30.455	34.8006	31.101	4.25032	9.15483	8.9925	20.4984
40	27.3	44.7712	12.7676	16.8941	43.65	32.3856	32.7221	36.1123	15.1772	6.14888	9.93944	8.5595
45	20.286	23.9732	34.0116	22.0627	27.143	32.9866	34.195	19.3817	15.9138	10.3225	8.04981	12.6627
50	20.694	16.9356	7.84377	9.98154	20.347	19.4678	17.0472	23.9577	6.53844	9.58296	7.69259	20.5399
55	23.6	23.5732	9.91218	8.84767	18.8	23.7866	15.109	25.8477	4.68187	8.27766	6.22492	18.2691
60	12.1355	26.1356	11.1355	8.13257	12.1355	5.13546	12.1355	6.13544
Time (min)	MOMBA	MOMBA	MOMBA	MOMBA	MOMBA	C
5	4.27991	2.86319	13.4418	1.88592	42.0108
10	4.18924	-1.49253	3.3535	9.84508	2.34889
15	3.60154	2.77923	0.532052	37.635	0.414512
20	2.76196	19.5338	13.3008	14.6105	5.81177
25	3.02055	25.9313	0.465362	6.41291	1.54673
30	3.03062	0.659667	2.36232	4.83451	18.0024
35	-4.35044	23.7921	1.39178	12.0246	1.1567
40	-4.02132	21.5924	3.49455	6.27857	0.0858745
45	-4.00453	10.4227	1.78805	0.720593	2.33593
50	-2.8392	15.6684	6.50358
55	4.68187	8.27766	6.22492	18.2691
	MOMBA	MOMBA	MOMBA	MOMBA	MOMBA	MOMBA + CATPB	MOMBA + CATPB	MOMBA + CATPB	MOMBA + CATPB	D
5	0.0163904	0.00626903	0.00683812	0.006481	0.00752283	0.011143	0.0107858	0.0297653	0.0117268
10	0.0052819	0.0133567	0.0170567	0.0138977	0.0160281	0.00997536	0.011465	0.0087458	0.00787565
15	0.0149386	0.00549066	0.0164907	0.0154907	0.0185888	0.00864749	0.0124764	0.0110376	0.0100384
20	0.00759172	0.00900686	0.0150686	0.0100686	0.0120823	0.00931658	0.00795842	0.00862243	0.00995833
25	0.0123285	0.00647903	0.0256525	0.0298643	0.030783	0.00969333	0.008236	0.0119924	0.0119783
30		0.0207386	0.0376522	0.0381522	0.0451826	0.01556	0.0103033	0.0192517	0.00071643
35	0.00619898	0.0145251	0.0284813	0.0334424	0.0341776	0.0091	0.0149237	0.0285117	0.0112983
40	0.0128766	0.0077992	0.00890205	0.00479699	0.0106825	0.010143	0.0119866	0.0147657	0.0129477
45	0.0195353	0.00471086	0.0161823	0.0159715	0.0194187	0.010347	0.0084678	0.00776767	0.0098374
50	0.0152834	0.0154216	0.0145942	0.0163289	0.017513	0.0118	0.0117866	0.00975766	0.00884767
55	0.012534	0.0234628	0.0201002	0.028	0.0241202
60	0.0186213
	INDUCIBLE (N:4)	INDUCIBLE (N:4)	INDUCIBLE (N:4)	INDUCIBLE (N:4)		E
5	0.00897752	0.00994125	0.0107348	0.00598825
10	0.00459712	0.0130993	0.00385363	0.0619869
15	0.0143865	0.00966206	0.00977516	0.0193241
20	0.01224	0.00878618	0.0115146	0.0175724
25	0.0116228	0.00228355	0.0144291	0.0045671
30	0.0110113	0.00527412	0.0188673	0.0105482
35	0.00990877	0.0089956	0.0137902	0.0179912
40	0.0135666	0.00489722	0.0158438	0.00979445
45	0.0163102	0.00875125	0.0183785	0.0175025
50	0.0125326	0.0108323	0.0225975	0.0216646
55	0	0.0181761	0.0319367	0.0363521
