# Supplementary material for: Chemogenetics defines a short-chain fatty acid receptor gut–brain axis
Source: eLife. 2022 Mar 1;11:e73777. doi: 10.7554/eLife.73777 (PMC8887895; doi:10.7554/eLife.73777)
Supplement: Figure 2—source data 1. [file elife-73777-fig2-data1.xlsx]

## Sheet: figure 2
water	MOMBA	water	B
115	105	150
160	105	160
135	95	120
160	115	120
130	90	140
125	85	130
water	MOMBA	water	C
135	150	160
150	120	145
145	120	135
165	115	120
140	130	145
150	160	150
water	MOMBA	water	D
135	130	140
125	95	100
156	150	140
130	160	175
95	100	120
water	C3	E
180	160
150	65
149	110
180	70
75	80
125	70
