# Supplementary material for: Chemogenetics defines a short-chain fatty acid receptor gut–brain axis
Source: eLife. 2022 Mar 1;11:e73777. doi: 10.7554/eLife.73777 (PMC8887895; doi:10.7554/eLife.73777)
Supplement: Figure 4—figure supplement 1—source data 1. [file elife-73777-fig4-figsupp1-data1.xlsx]

## Sheet: 98996_1_additional_figure_data_
C3	MOMBA	MOMBA + CATPB		B
87.5	57.14	0
65	23	2
82	25	3
100	10	0
100	58	0
	50	0
C3	MOMBA	C
100	0
70	0
80	0
95	5
80	3
