# Supplementary material for: Chemogenetics defines a short-chain fatty acid receptor gut–brain axis
Source: eLife. 2022 Mar 1;11:e73777. doi: 10.7554/eLife.73777 (PMC8887895; doi:10.7554/eLife.73777)
Supplement: Figure 4—source data 1. [file elife-73777-fig4-data1.xlsx]

## Sheet: 98996_1_figure_2234453_r1707t
MOMBA	MOMBA + CATPB	MOMBA + FR900359	MOMBA + PTX		C
35	0	0	40
50	0	10	30
40	0	2	30
48	0	5	30
10	10	0	60
20	8		45
0	0
80
90
C3	C3 + CATPB	C3 + FR900359	C3 + PTX	D
80	80	80	0
90	70	95	0
80	75	80	30
70	90	75	10
75	50		15
100
80
MOMBA	C3	E
0	80
0	95
0	75
0	65
0	70
WT	FFA3KO	F
100	10
90	0
64	0
83	0
90	0
