# Supplementary material for: Chemogenetics defines a short-chain fatty acid receptor gut–brain axis
Source: eLife. 2022 Mar 1;11:e73777. doi: 10.7554/eLife.73777 (PMC8887895; doi:10.7554/eLife.73777)
Supplement: Figure 5—source data 1. [file elife-73777-fig5-data1.xlsx]

## Sheet: 98996_1_figure_2237121_r1yc5m
saline	C3	saline	C3	MOMBA	Saline	MOMBA	A
47.6394	49.699	30.0533	64.3984	34.3349	23.9636	26.329
25.9638	64.9782	26.1246	38.8274	37.0564	36.0121	39.2275
20.6426	47.5858	25.2346	43.9873	42.6921	9.08319	25.1235
16.5322	53.8692	22.5119	52.1921	47.8691	27.8867	10.1596
		34.854		30.9865	14.0035	30.8544
		25.7539		27.7665	15.643	18.8655
		17.7117		28.8643		23.6755
